# Supplementary material
Source: MDPI journal article supplement (https://www.mdpi.com/2076-3263/12/1/36)
Supplement: s1 [file s1]

## **Vezinet et al., Supplementary Information - Outline**

|          |                                                                          |          |
|----------|--------------------------------------------------------------------------|----------|
| <b>1</b> | <b>Apatite laser-ablation split stream (LASS) analyses .....</b>         | <b>2</b> |
| 1.1      | Metadata for LASS U–Th–Pb/Sm–Nd analyses .....                           | 2        |
| 1.2      | Iolite data reduction .....                                              | 5        |
| 1.3      | Identification of common-Pb during zircon U–Pb analyses .....            | 5        |
| <b>2</b> | <b>Uncertainty propagation workflow .....</b>                            | <b>7</b> |
| 2.1      | Uncertainty in U–Th–Pb isotope ratios and dates .....                    | 7        |
| 2.2      | Uncertainty in Sm–Nd isotopes ratios.....                                | 8        |
| <b>3</b> | <b>Methodology for the determination of whole-rock major- and trace-</b> |          |
|          | <b>elements composition.....</b>                                         | <b>8</b> |
|          | <b>References.....</b>                                                   | <b>9</b> |

# 1 Apatite laser-ablation split stream (LASS) analyses

Apatite U–Pb/Sm–Nd isotopes LASS analyses were conducted at the Arctic Resource Lab, University of Alberta (Canada).

## 1.1 Metadata for LASS U–Th–Pb/Sm–Nd analyses

Table S1 shows the main analytical parameters used to conduct the LASS U–Th–Pb/Sm–Nd isotopes analyses.

**Table S1:** Metadata for the laser-ablation split-stream analyses performed during this study

| Laboratory & Sample Preparation |                                                                                                                                                                                                              |
|---------------------------------|--------------------------------------------------------------------------------------------------------------------------------------------------------------------------------------------------------------|
| Laboratory name                 | Arctic Resource Lab, University of Alberta (Canada)                                                                                                                                                          |
| Sample type/mineral             | Apatite $\text{Ca}_5(\text{PO}_4)_3(\text{F}, \text{OH}, \text{Cl})$                                                                                                                                         |
| Sample preparation              | Conventional mineral separation, polished 1 inch resin mount,                                                                                                                                                |
| Imaging                         | CL & BSE (Gemini supra 55 VP Zeiss; EVO MA15 Zeiss; JEOL JSM-5910 LV)                                                                                                                                        |
| Laser ablation system           |                                                                                                                                                                                                              |
| Make, Model & type              | RESOLution ArF excimer                                                                                                                                                                                       |
| Ablation cell                   | Laurin Technic S-155                                                                                                                                                                                         |
| Laser wavelength                | 193 nm                                                                                                                                                                                                       |
| Pulse width                     | 20 ns                                                                                                                                                                                                        |
| Fluence                         | 5.5 J.cm <sup>-2</sup> (energy set: 120 mJ)                                                                                                                                                                  |
| Repetition rate                 | 6 Hz                                                                                                                                                                                                         |
| Ablation/Washout duration       | 50 secs / 50 secs                                                                                                                                                                                            |
| Ablation rate                   | 0.125 cm.pulse <sup>-1</sup> with the <i>ca.</i> 6.5 J.cm <sup>-2</sup> setting (measured on zircon)                                                                                                         |
| Spot diameter nominal           | 130 $\mu\text{m}$                                                                                                                                                                                            |
| Sampling mode / pattern         | Static spot ablation                                                                                                                                                                                         |
| Carrier gas                     | 100% He in the cell, Ar and N <sub>2</sub> make-up gas combined using a Y-piece 50% along the sample transport line to the torch.                                                                            |
| Cell carrier gas flow           | 0.8- 0.9 l.min <sup>-1</sup>                                                                                                                                                                                 |
| SC-ICP-MS Instrument            |                                                                                                                                                                                                              |
| U–Th–Pb isotopes                |                                                                                                                                                                                                              |
| Make, Model & type              | Thermo Fisher Scientific, Element XR, SC-SF-ICP-MS                                                                                                                                                           |
| Sample introduction             | Ablation aerosol introduced through Tygon tubing                                                                                                                                                             |
| RF power                        | 1200W                                                                                                                                                                                                        |
| Make-up gas flow (l/min)        | Total gas is made of ~ 1.6 L.min <sup>-1</sup> of Ar, ~ 800 mL.min <sup>-1</sup> of He and ~ 14 mL.min <sup>-1</sup> of N <sub>2</sub> .<br>This total gas is divided between both ICP-MS at a ~ 50-50 rate. |
| Detection system                | 202, 208, 232 in triple mode.<br>206 and 238 in analogue mode.                                                                                                                                               |

|                                           |                                                                                               |
|-------------------------------------------|-----------------------------------------------------------------------------------------------|
|                                           | 204 and 207 in counting mode<br>235 is calculated using canonical value. No Faraday cup used. |
| Masses measured                           | 202, 204, 206, 207, 208, 232, 238                                                             |
| Integration time per peak/<br>dwell times | 30 ms on 202, 204, 208 and 232; 60 ms on 206, 207 and 238                                     |
| Total integration time                    | 300 ms for each output datapoint                                                              |
| IC Dead time                              | 20 ns                                                                                         |

**Table S1:** (continued)

| MC-ICP-MS Instrument                               |                                                                                                                                                                                                                                                  |     |     |       |     |     |     |     |
|----------------------------------------------------|--------------------------------------------------------------------------------------------------------------------------------------------------------------------------------------------------------------------------------------------------|-----|-----|-------|-----|-----|-----|-----|
| Sm-Nd isotopes                                     |                                                                                                                                                                                                                                                  |     |     |       |     |     |     |     |
| Make, Model & type                                 | Thermo Fisher Scientific, Neptune Plus, MC-SF-ICP-MS                                                                                                                                                                                             |     |     |       |     |     |     |     |
| Sample introduction                                | Ablation aerosol introduced tygon tubing.<br>Ni-Jet Sample cone and X-Skimmer cone.                                                                                                                                                              |     |     |       |     |     |     |     |
| RF power                                           | 1200 W                                                                                                                                                                                                                                           |     |     |       |     |     |     |     |
| Make-up gas flow (l/min)                           | Total gas is made of ~ 1.6 L.min <sup>-1</sup> of Ar, ~ 800 mL.min <sup>-1</sup> of He and ~ 14 mL.min <sup>-1</sup> of N <sub>2</sub> .<br>This total gas is divided between both ICP-MS at a ~ 50-50 rate.                                     |     |     |       |     |     |     |     |
| Detection system                                   | Static Faraday (attached to 10 <sup>11</sup> Ω amplifier) measurement                                                                                                                                                                            |     |     |       |     |     |     |     |
| Masses measured                                    | 143, 144, 145, 146, 147, 148, 149, 150                                                                                                                                                                                                           |     |     |       |     |     |     |     |
| Integration time per output datapoint              | 1.049 secs                                                                                                                                                                                                                                       |     |     |       |     |     |     |     |
| Cup configuration                                  | L3                                                                                                                                                                                                                                               | L2  | L1  | Axial | H1  | H2  | H3  | H4  |
|                                                    | 143                                                                                                                                                                                                                                              | 144 | 145 | 146   | 147 | 148 | 149 | 150 |
| Data Processing                                    |                                                                                                                                                                                                                                                  |     |     |       |     |     |     |     |
| Gas blank                                          | 30 second on-peak zero subtracted both for U-Pb and Lu-Hf measurements                                                                                                                                                                           |     |     |       |     |     |     |     |
| Calibration strategy                               | <b>Bancroft apatite</b> was used as primary (calibration) reference material for both U-Pb and Sm-Nd isotope analyses.<br><b>Durango and Mud Tank</b> were used as secondary (validation) for both U-Pb and Sm-Nd isotope analyses.              |     |     |       |     |     |     |     |
| Reference Material info                            | Bancroft: [1]<br>Durango and Mud Tank: [1,2]                                                                                                                                                                                                     |     |     |       |     |     |     |     |
| Data processing package used / Correction for LIEF | Iolite v3 software package [3-5] using the following DRS: “ <i>U_Pb Geochron 4</i> ” for U-Th-Pb isotopes analyses and “ <i>SmNd_downhole</i> ” for Sm-Nd isotopes. LIEF correction assumes matrix match between reference material and samples. |     |     |       |     |     |     |     |
| Mass discrimination                                | Standard-sample bracketing with <sup>207</sup> Pb/ <sup>206</sup> Pb and <sup>206</sup> Pb/ <sup>238</sup> U normalized to primary reference material.                                                                                           |     |     |       |     |     |     |     |
| Common-Pb correction, composition and uncertainty  | No common-Pb correction applied to the data                                                                                                                                                                                                      |     |     |       |     |     |     |     |

|                                             |                                                                                                                                                                                                                                                                                                                                                                |
|---------------------------------------------|----------------------------------------------------------------------------------------------------------------------------------------------------------------------------------------------------------------------------------------------------------------------------------------------------------------------------------------------------------------|
| Nd mass bias coefficient ( $\beta^{Nb}$ )   | Calculated using $^{146}\text{Nd}/^{144}\text{Nd}$ ratio of 0.7219 and the exponential law of [6].                                                                                                                                                                                                                                                             |
| Isobaric interferences on $^{144}\text{Nd}$ | Monitored with invariant Nd ratios: $^{145}\text{Nd}/^{144}\text{Nd}$ , $^{148}\text{Nd}/^{144}\text{Nd}$ and $^{150}\text{Nd}/^{144}\text{Nd}$ , used to assess the quality of the analysis, and its relative inaccuracy due to isobaric interferences from Sm on masses 144, 148, and 150 [1].                                                               |
| Uncertainty level & propagation             | Ages are quoted at a coverage factor of 2 absolute ( <i>ca.</i> 95% confidence interval). No propagation of systematic uncertainty is made on single data points, only on weighted mean or discordia intercepts. Propagation is by quadratic addition. Reproducibility and age uncertainty of reference material uncertainty are propagated where appropriate. |
| Quality control / Validation                | Results of LASS analyses on validation reference material are reported in Table S1.                                                                                                                                                                                                                                                                            |

## 1.2 Iolite data reduction

LASS analyses were processed offline using the Data Reduction Scheme (DRS) supplied by Iolite v3 software [3,4]. Isotope measurements from both the SC-SF-ICP-MS (U–Th–Pb isotope measurements) and the MC-SF-ICP-MS (Sm–Nd isotope measurements) were processed simultaneously through the “Run in Multiple DRS mode” option of the Iolite v3 software. This option implies that for each LASS analysis the integration time of the U–Th–Pb isotope analysis and the integration time Sm–Nd isotope analysis are identical. Moreover, as demonstrated in Figure S1, the integration time is manually determined for each single analysis in order to best represent the area of the grain selected prior LASS analysis, and reject obvious spurious parts of the signal.

## 1.3 Identification of common-Pb during apatite U–Pb isotope analyses

In addition to the masses 206, 207 and 208, we also measured the intensity on mass 204 to constrain the amount of common lead during the U–Pb analyses. To limit mercury (Hg) contamination and isobaric interferences in lead measurement, we used 3 Hg traps (VICI® Metronics Hg trap) positioned on the Ar line, the He line and the N<sub>2</sub> line. As the mass resolution power used in this study ( $M/\Delta M=300$ ) is not sufficient to separate <sup>204</sup>Pb ( $m=203.973044$ ) and <sup>204</sup>Hg ( $m=203.973494$ ) – that requires a  $M/\Delta M$  of *ca.* 408,000 – the signal obtained during scanning the 204-mass represents the combination of both isotopes. The potential contamination that would persist after the Hg-trapping step was thus quantified measuring mass 202, which is an interference-free mass of the <sup>202</sup>Hg. Using the measured <sup>202</sup>Hg value and the natural ratio of <sup>202</sup>Hg/<sup>204</sup>Hg (=29.74/6.82), we calculated the proportion of the 204-mass signal attributable to <sup>204</sup>Hg and hence the 204-mass signal attributable to <sup>204</sup>Pb. The <sup>204</sup>Pb value was then used to calculate the <sup>206</sup>Pb/<sup>204</sup>Pb ratio and, with reference to the model values of [7], to yield the  $f^{206}\text{Pb}_c$  reported in the Supplementary Table using the following equation:

$$f^{206}\text{Pb}_c(\%) = \frac{(^{206}\text{Pb}/^{204}\text{Pb})_{\text{Stacey \& Kramers, 1975}}}{(^{206}\text{Pb}/^{204}\text{Pb})_{\text{measured}}} \cdot 100$$

We emphasise that no common-Pb correction was applied to our apatite U–Pb isotope data.

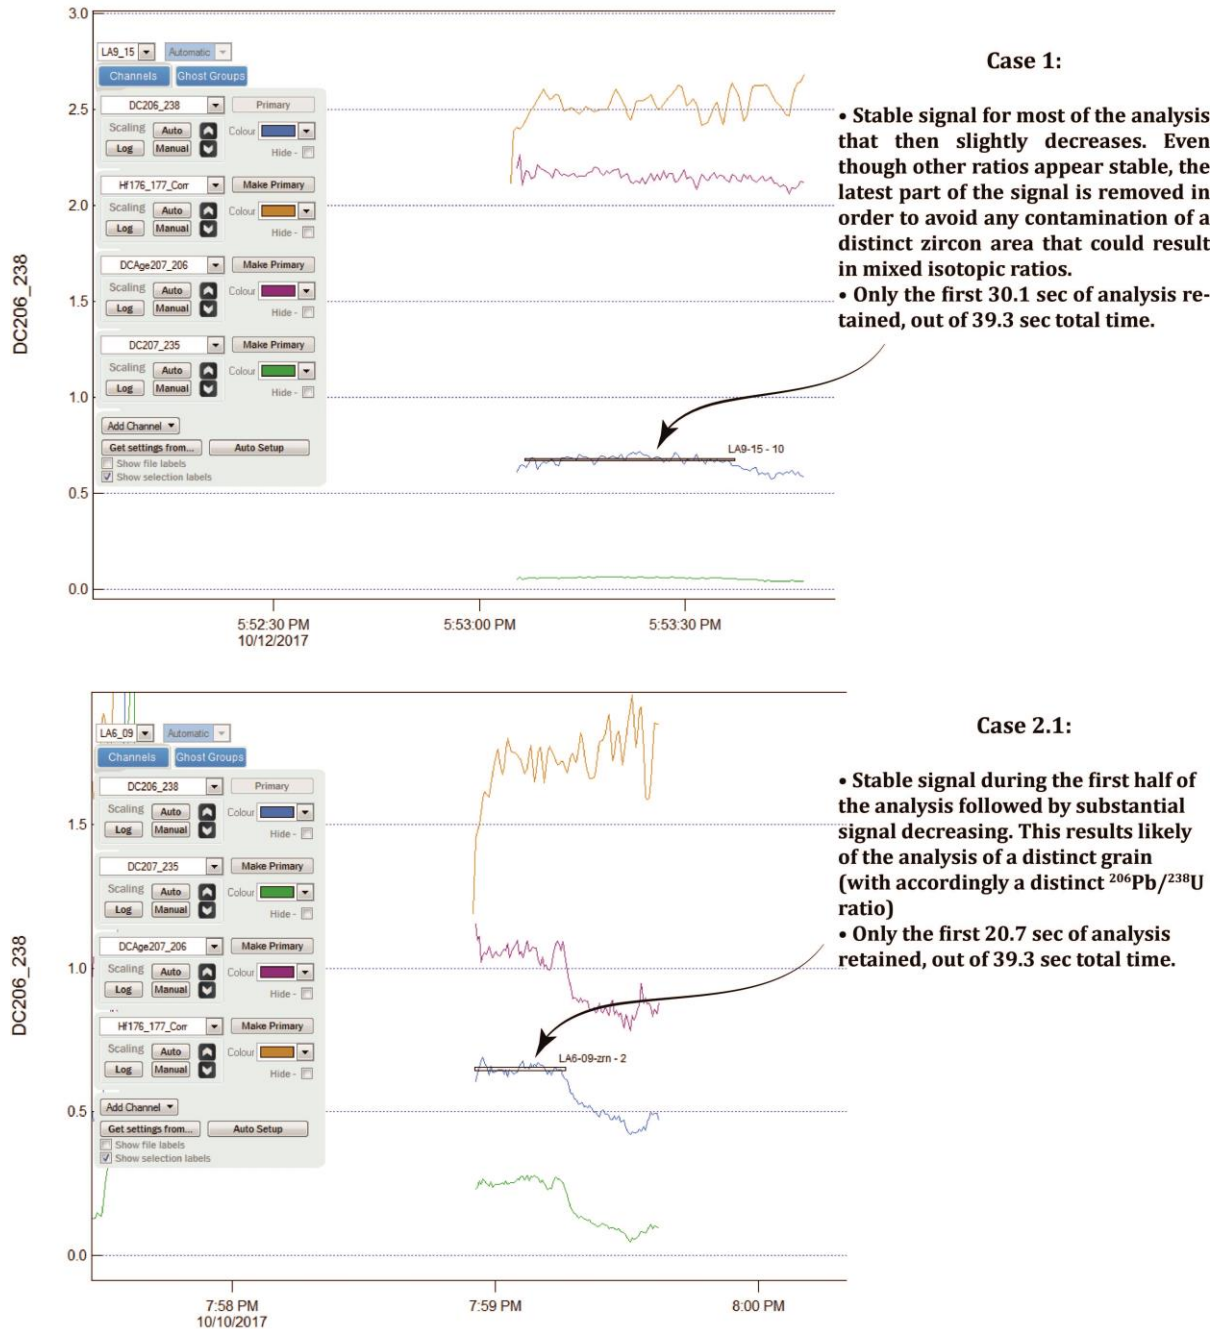

**Figure S1. Time-resolved signal obtained in the course of LASS analysis.** These diagrams are drawn from the Iolite main Windows and based on zircon U–Pb/Hf analyses. The X-axis represents the time, the Y-axis represents the intensity of the selected wave. The horizontal black stroke rectangle represents the selected integration time. On every image, the grey panel located on the left reports the name of the displayed waves. DC206\_208 = Down-hole Corrected  $^{206}\text{Pb}/^{238}\text{U}$  isotopic ratio; DC207\_235 = Down-hole Corrected  $^{207}\text{Pb}/^{235}\text{U}$  ratio; DCAge207\_206 = Down-hole Corrected  $^{207}\text{Pb}/^{206}\text{Pb}$  isotopic age; Hf176\_177\_corr =  $^{176}\text{Hf}/^{177}\text{Hf}$  isotopic ratio corrected from mass bias fractionation. On every diagram, DC206\_208 is the selected wave.

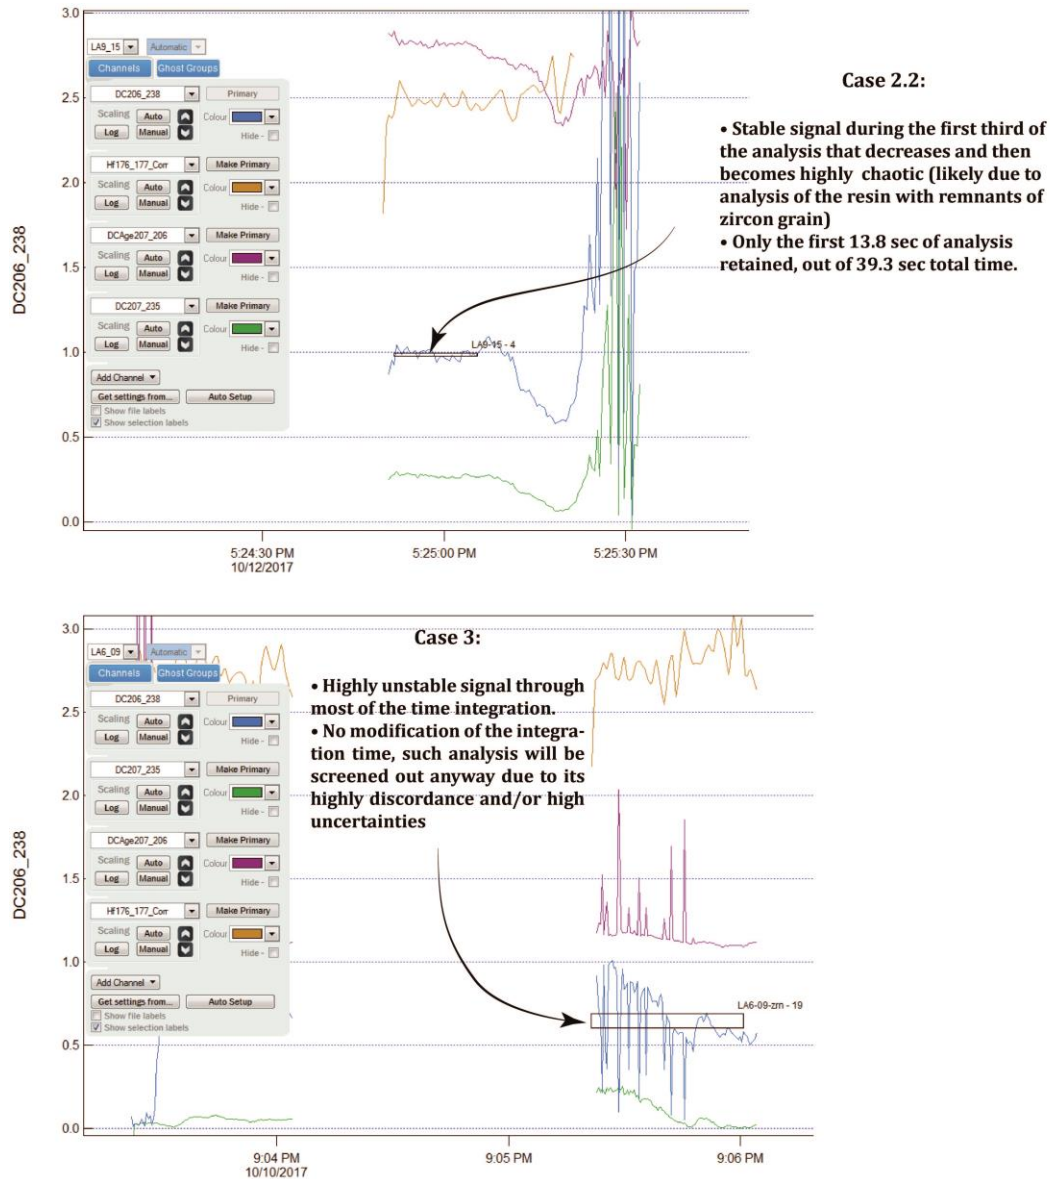

Figure S1. (continued)

## 2 Uncertainty propagation workflow

### 2.1 Uncertainty in U–Th–Pb isotope ratios and dates

Uncertainties in U–Th–Pb isotope ratios are those produced by the uncertainty propagation workflow built into Iolite software [3]. Systematic (external) uncertainties are reported where relevant, calculation from IsoplotR [8]. Uncertainties are reported at 95% confidence interval unless stated otherwise.

## **2.2 Uncertainty in Sm–Nd isotopes ratios**

Uncertainty in Sm–Nd isotope ratios are those produced by the uncertainty propagation workflow built into Iolite software. The “SmNd\_downhole” DRS of Iolite v3 used for this study does not include the “pseudo-secondary standard” pooling method implemented for U–Th–Pb analyses [3]. Thus, uncertainty in Sm–Nd isotopic ratios are measured uncertainties. No excess variance has however been detected in the analytical run.

## **3 Methodology for the determination of whole-rock major- and trace-elements composition**

Whole-rock chemical composition of the investigated rock was determined at the Service d’Analyse de Roches et Minéraux (SARM). A thorough description of the methodology is reported in [9]. The only difference with [9] is the mass-spectrometer devices used at the present day. The SARM is currently using iCap6500 and iCapQ (both ThermoFisher instruments) as ICP-AES and ICP-MS devices respectively.



## References

1. Fisher, C.M.; Bauer, A.M.; Luo, Y.; Sarkar, C.; Hanchar, J.M.; Vervoort, J.D.; Tapster, S.R.; Horstwood, M.; Pearson, D.G. Laser ablation split-stream analysis of the Sm-Nd and U-Pb isotope compositions of monazite, titanite, and apatite—Improvements, potential reference materials, and application to the Archean Saglek Block gneisses. *Chem. Geol.* **2020**, *539*, 119493, doi: <https://doi.org/10.1016/j.chemgeo.2020.119493>.
2. Yang, Y.-H.; Wu, F.-Y.; Yang, J.-H.; Chew, D.M.; Xie, L.-W.; Chu, Z.-Y.; Zhang, Y.-B.; Huang, C. Sr and Nd isotopic compositions of apatite reference materials used in U–Th–Pb geochronology. *Chem. Geol.* **2014**, *385*, 35-55, doi: <https://doi.org/10.1016/j.chemgeo.2014.07.012>.
3. Paton, C.; Woodhead, J.D.; Hellstrom, J.C.; Hergt, J.M.; Greig, A.; Maas, R. Improved laser ablation U-Pb zircon geochronology through robust downhole fractionation correction. *Geochim. Geophys. Geosyst.* **2010**, *11*, doi: <https://doi.org/10.1029/2009GC002618>.
4. Paton, C.; Hellstrom, J.; Paul, B.; Woodhead, J.; Hergt, J. Iolite: Freeware for the visualisation and processing of mass spectrometric data. *J. Anal. At. Spectrom.* **2011**, *26*, 2508-2518, doi: [doi: 10.1039/C1JA10172B](https://doi.org/10.1039/C1JA10172B).
5. Fisher, C.M.; Paton, C.; Pearson, D.G.; Sarkar, C.; Luo, Y.; Tersmette, D.B.; Chacko, T. Data Reduction of Laser Ablation Split-Stream (LASS) Analyses Using Newly Developed Features Within Iolite: With Applications to Lu–Hf+U–Pb in Detrital Zircon and Sm–Nd+U–Pb in Igneous Monazite. *Geochim. Geophys. Geosyst.* **2017**, *18*, 4604-4622, doi: <https://doi.org/10.1002/2017GC007187>.
6. Russell, W.A.; Papanastassiou, D.A.; Tombrello, T.A. Ca isotope fractionation on the Earth and other solar system materials. *Geochim. Cosmochim. Acta* **1978**, *42*, 1075-1090, doi: [doi: 10.1016/0016-7037\(78\)90105-9](https://doi.org/10.1016/0016-7037(78)90105-9).
7. Stacey, J.S.; Kramers, J.D. Approximation of terrestrial lead isotope evolution by a two-stage model. *EPSL* **1975**, *26*, 207-221, doi: [https://doi.org/10.1016/0012-821X\(75\)90088-6](https://doi.org/10.1016/0012-821X(75)90088-6).
8. Vermeesch, P. IsoplotR: A free and open toolbox for geochronology. *Geosci. Front.* **2018**, *9*, 1479-1493, doi: <https://doi.org/10.1016/j.gsf.2018.04.001>.
9. Carignan, J.; Hild, P.; Mevelle, G.; Morel, J.; Yeghicheyan, D. Routine analyses of trace elements in geological samples using flow injection and low pressure on-line liquid chromatography coupled to ICP-MS: a study of geochemical reference materials BR, DR-N, UB-N, AN-G and GH. *Geostand. Geoanal. Res.* **2001**, *25*, 187-198, doi: [doi: 10.1111/j.1751-908X.2001.tb00595.x](https://doi.org/10.1111/j.1751-908X.2001.tb00595.x).
