# Supplementary material
Source: MDPI journal article supplement (https://www.mdpi.com/2076-3263/12/1/36)
Supplement: s1 [file s1]

**BSE image**

○ : O (ion-probe) +U-Pb/Hf (LASS)  
isotope analyses

○ : Trace element analyses

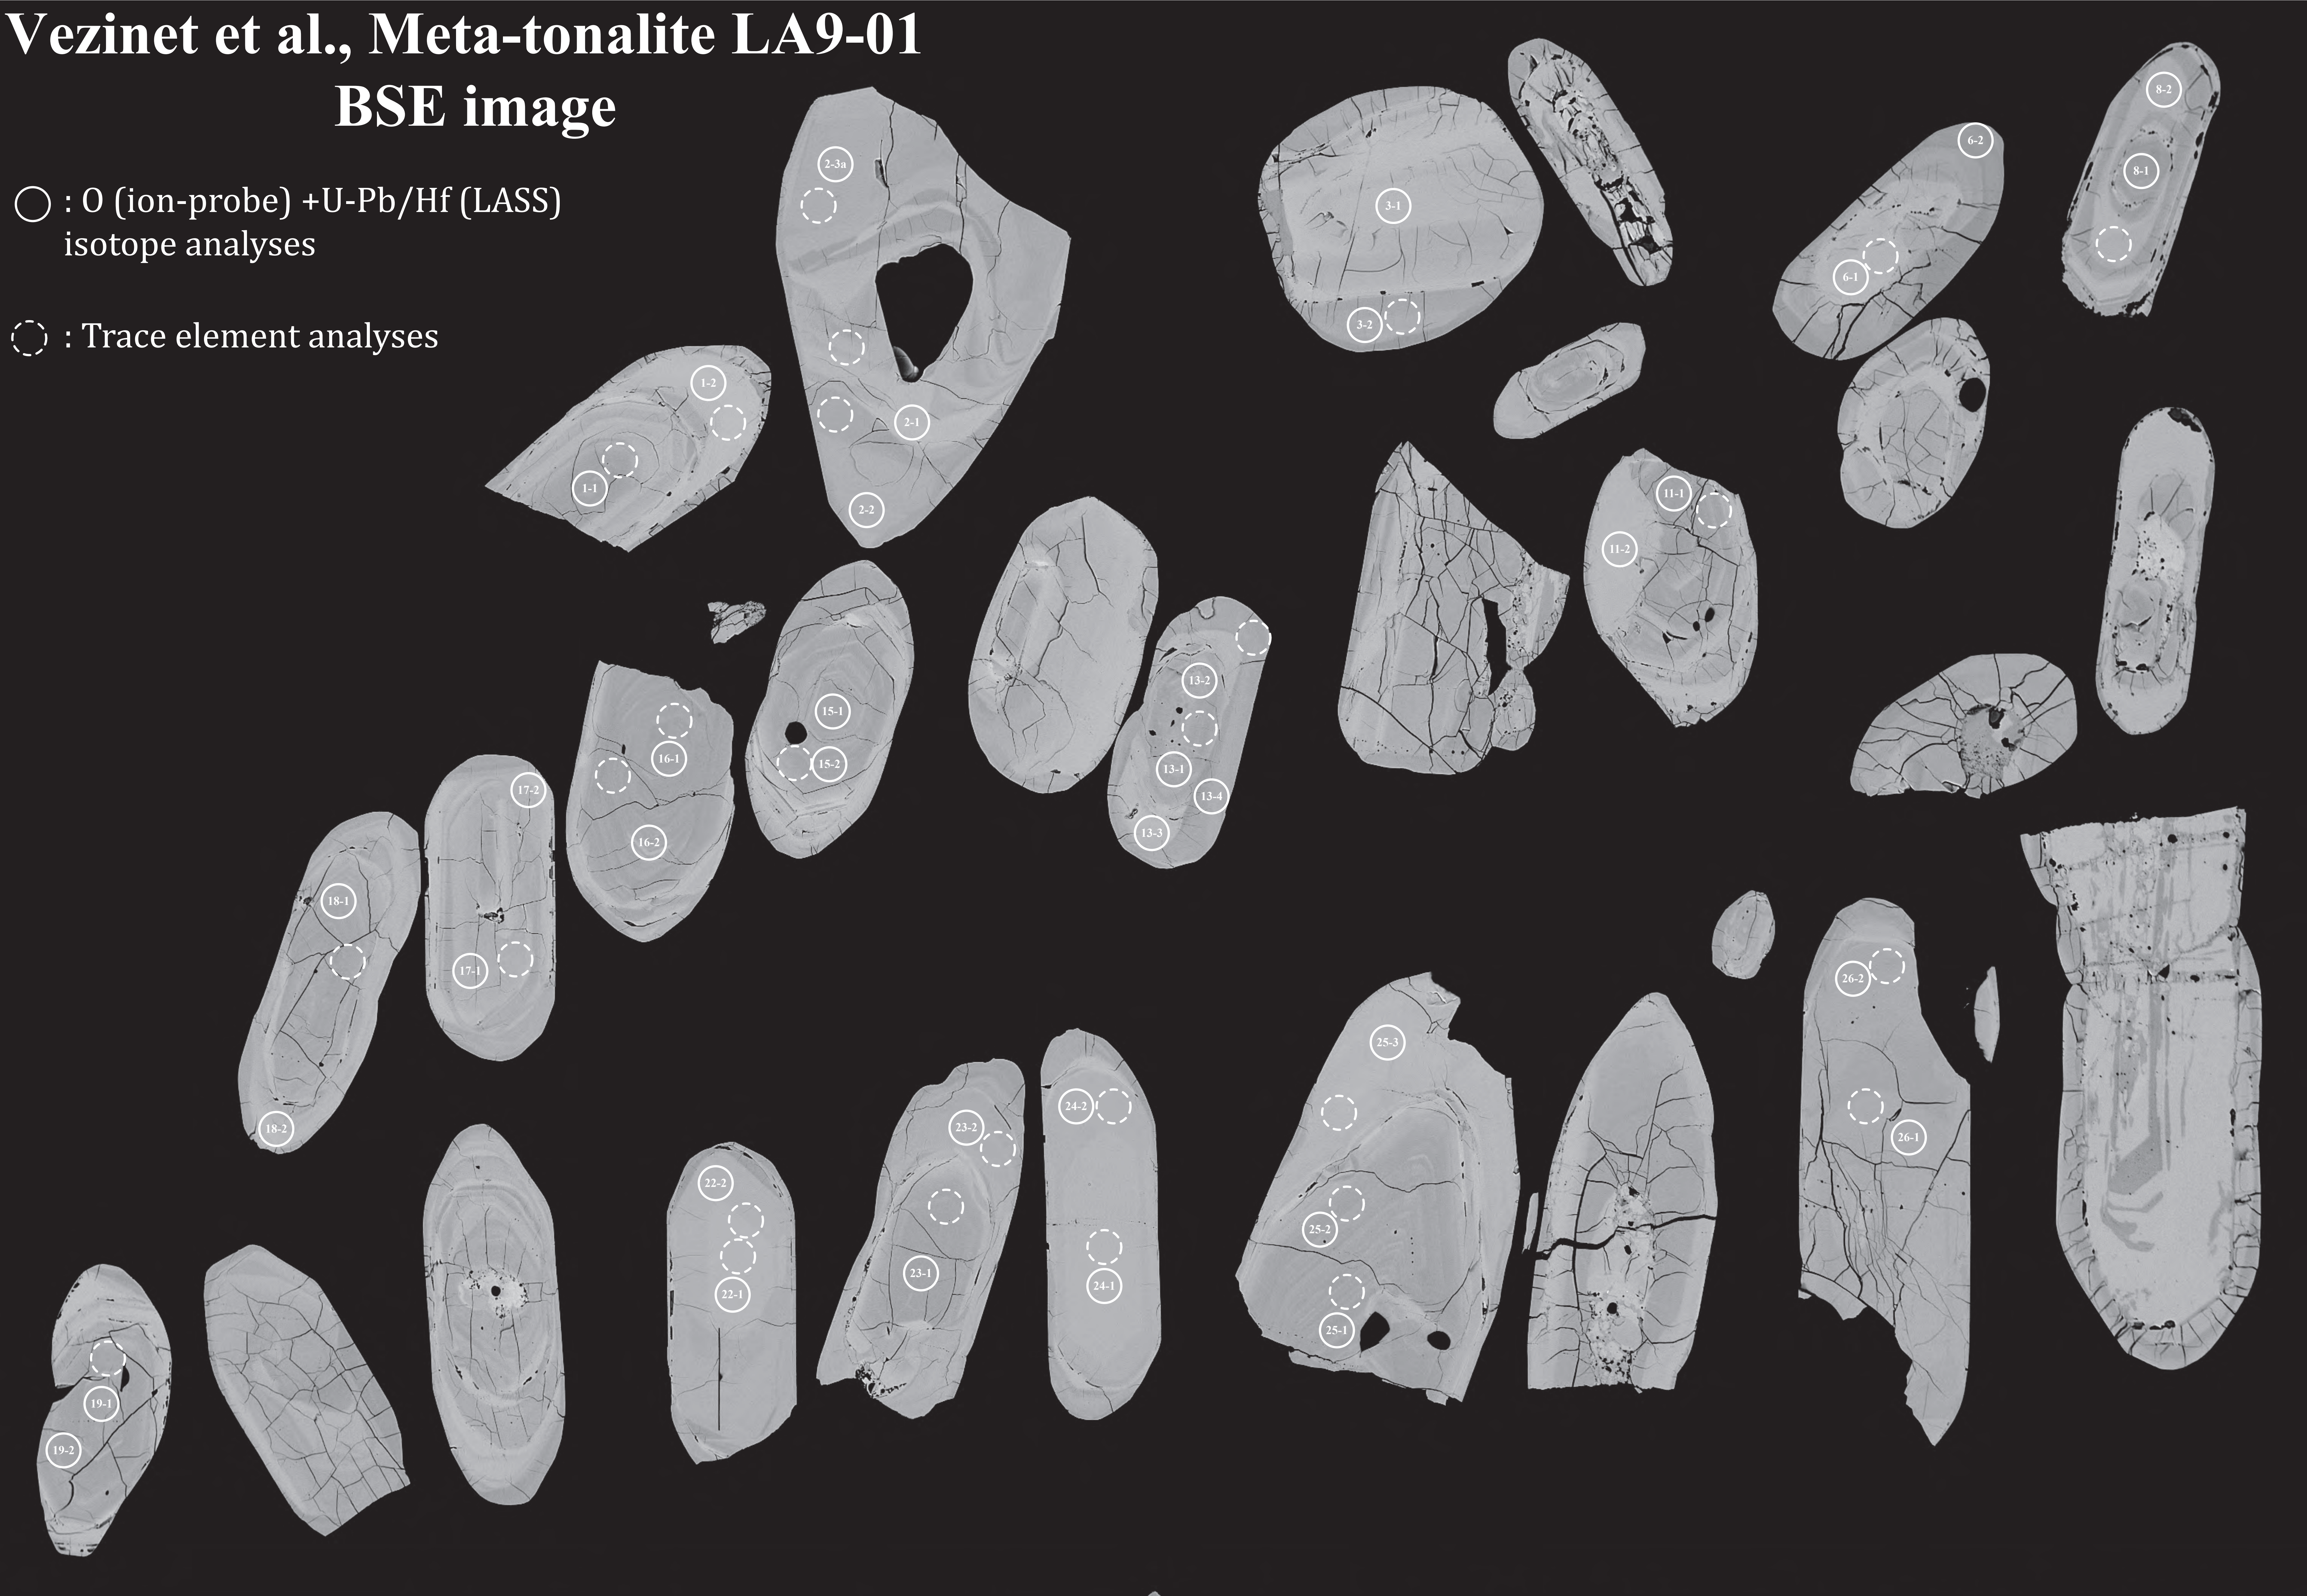

|                                                                                                           |                       |             |                                            |                |                  |
|-----------------------------------------------------------------------------------------------------------|-----------------------|-------------|--------------------------------------------|----------------|------------------|
| 200 $\mu\text{m}^*$<br> | Mag = 125 X           | WD = 9.5 mm | Signal A = NTS BSD                         | EHT = 20.00 kV | Date :2 Feb 2018 |
|                                                                                                           | Specimen I = -3.69 nA |             | File Name = SEM18004_M1483_S5069B_BS_1.tif |                |                  |

**CL image**

○ : O (ion-probe) +U-Pb/Hf (LASS)  
isotope analyses

○ : Trace element analyses

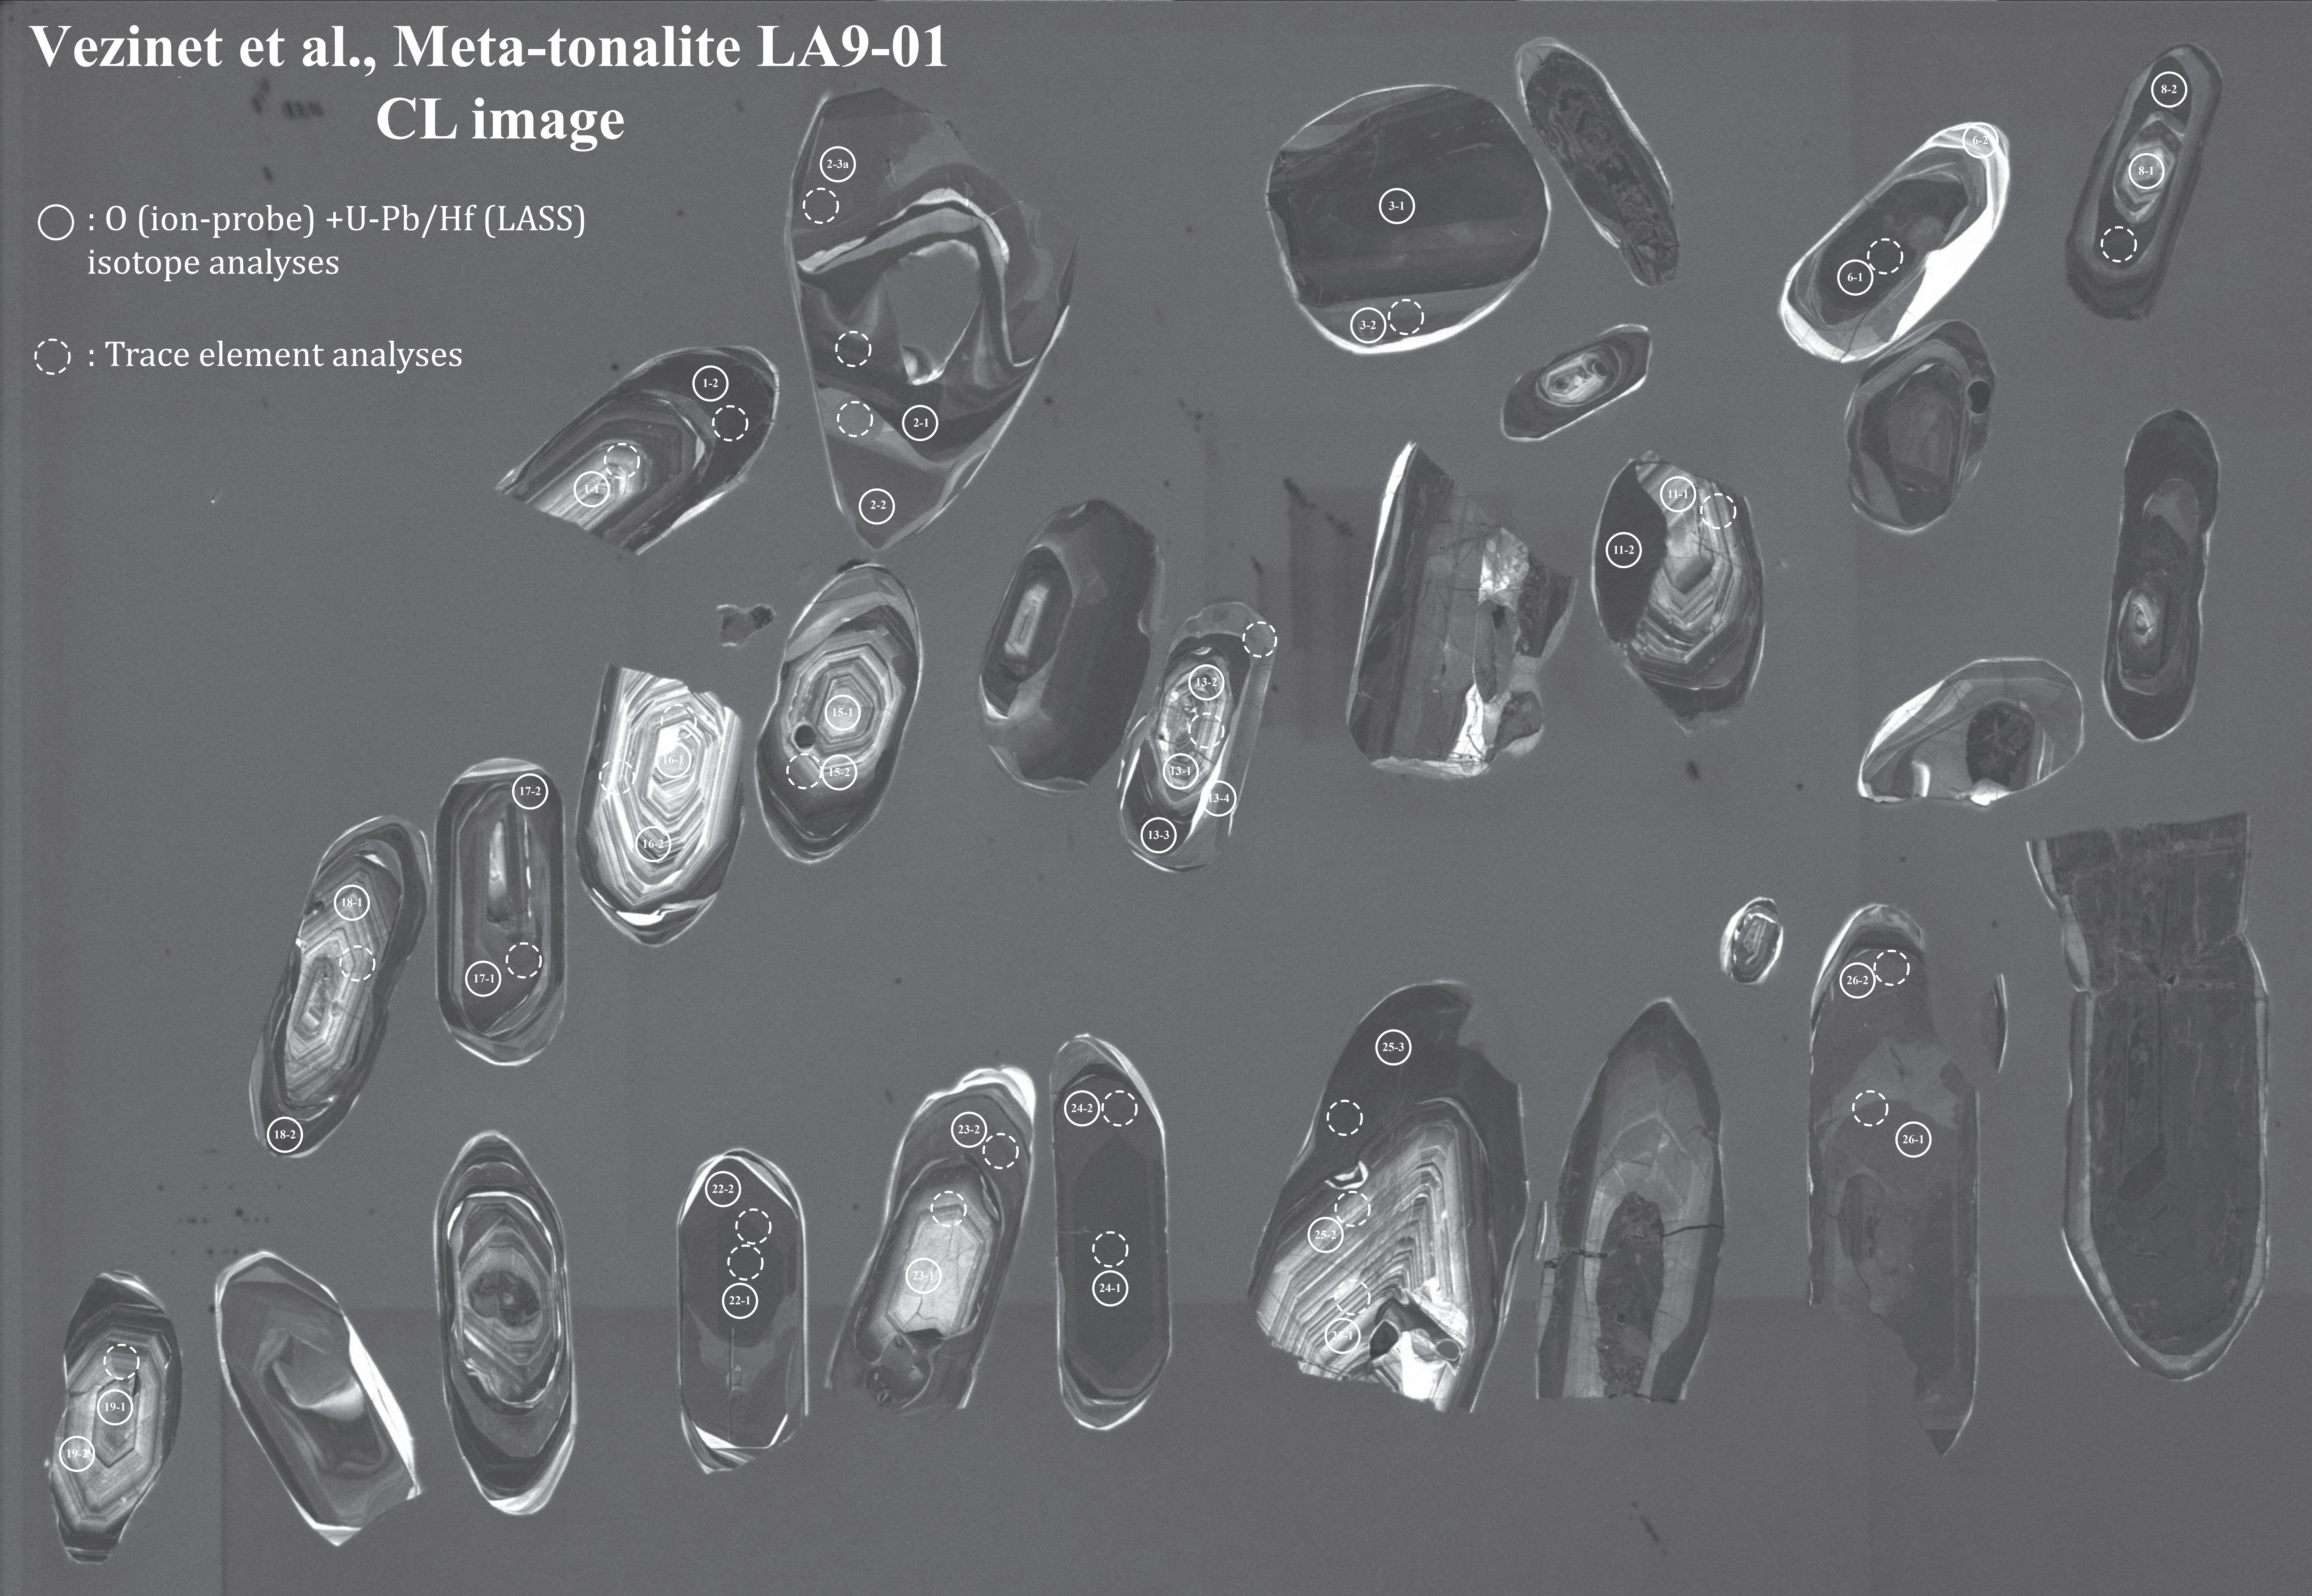

|                                                                                                           |                       |              |                                            |                |                  |
|-----------------------------------------------------------------------------------------------------------|-----------------------|--------------|--------------------------------------------|----------------|------------------|
| 100 $\mu\text{m}^*$<br> | Mag = 124 X           | WD = 15.0 mm | Signal A = Aux 1                           | EHT = 15.00 kV | Date :2 Feb 2018 |
|                                                                                                           | Specimen I = -3.66 nA |              | File Name = SEM18004_M1483_S5069B_CL_3.tif |                |                  |
