# Supplementary material
Source: MDPI journal article supplement (https://www.mdpi.com/2076-3263/12/1/36)

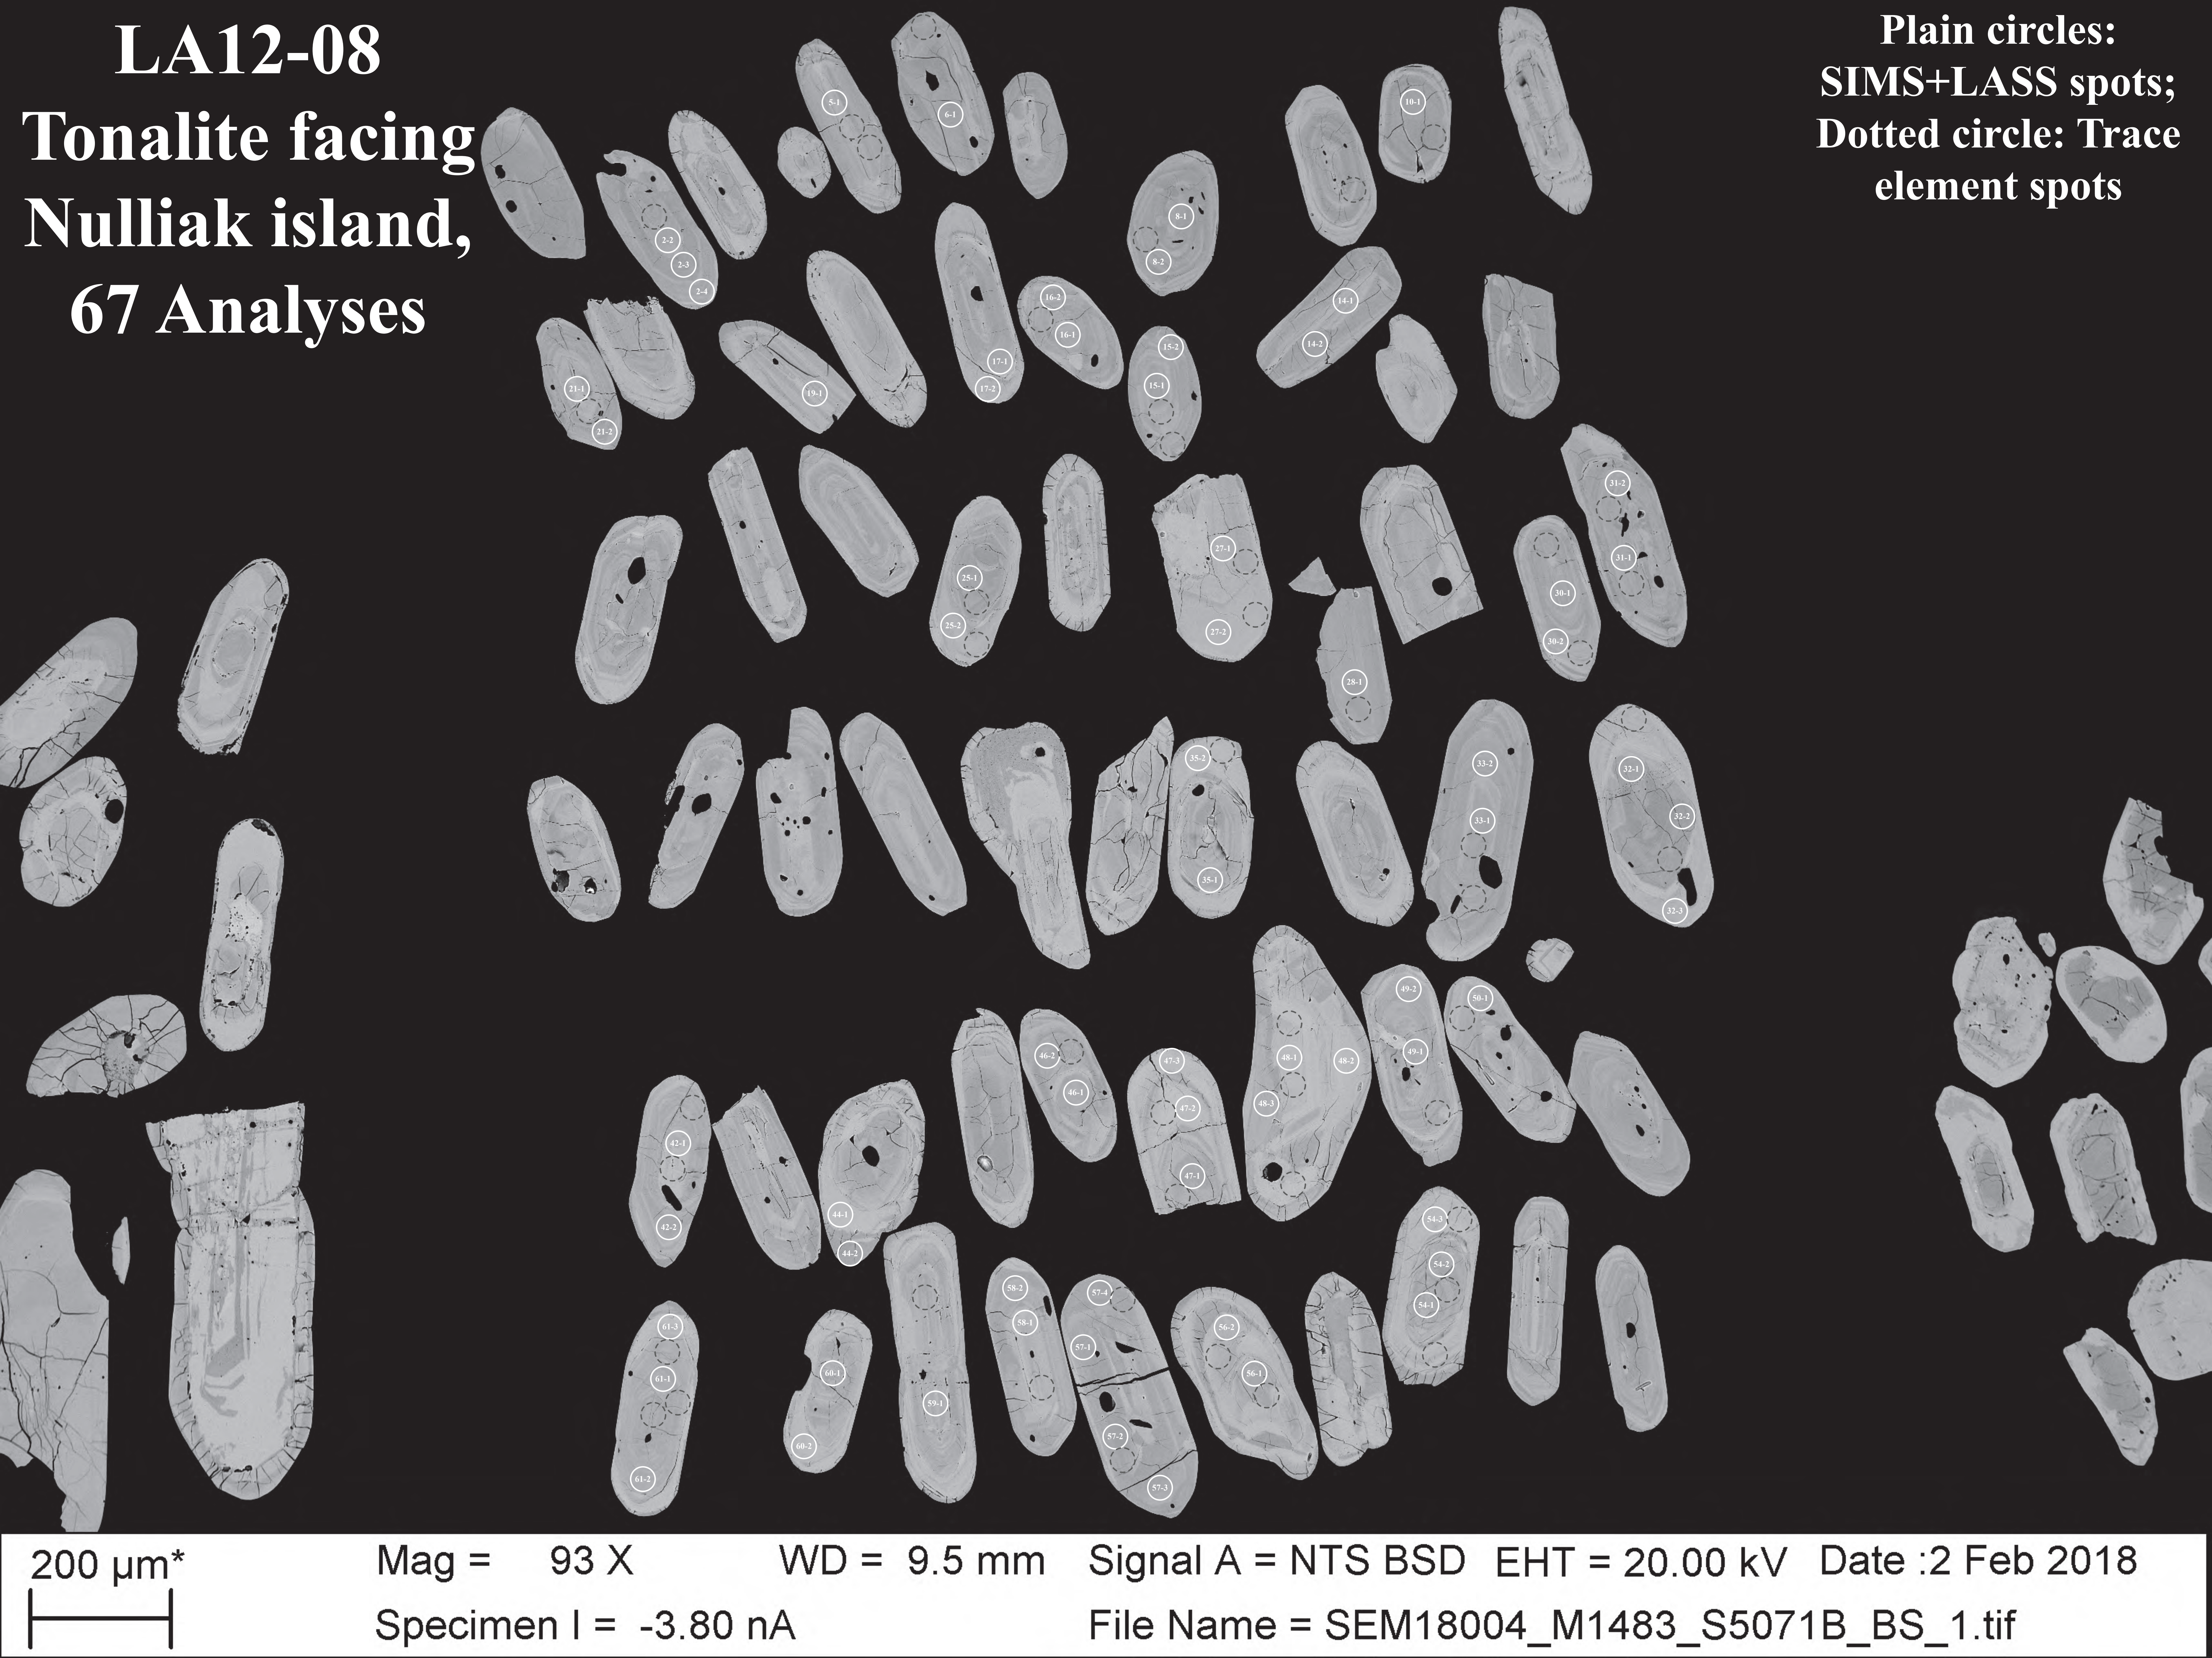

Supplement: s1 [file s1]
